# Supplementary material for: Development of a knowledge graph framework to ease and empower translational approaches in plant research: a use-case on grain legumes
Source: Front Artif Intell. 2023 Aug 3;6:1191122. doi: 10.3389/frai.2023.1191122 (PMC10435283; doi:10.3389/frai.2023.1191122)
Supplement: Supplementary file 1 [file Table_1.xlsx]

## Sheet: Sheet1
Table S1: List of QTL and RNA-seq datasets currently integrated in OrthoLegKB
ID	theme	species	author et al.	year	doi	type
Yuan et al. 2021	flowering	Lens culinaris	Yuan et al.	2021	10.1093/aob/mcab083	QTL
Haile et al. 2021	flowering	Lens culinaris	Haile et al.	2021	10.1002/tpg2.20144	QTL
Klein et al. 2020	multi-traits	Pisum sativum	Klein et al.	2020	10.1038/s41598-020-72548-9	QTL
Beji et al. 2020	cold stress	Pisum sativum	Beji et al.	2020	10.1186/s12864-020-06928-w	QTL
Aznar-Fernández et al., 2020	bruchids	Pisum sativum	Aznar-Fernández et al.	2020	10.1038/s41598-019-56987-7	QTL
Williams et al. 2022	flowering	Pisum sativum	Williams et al.	2022	10.1093/jxb/erac132	QTL
Gali et al. 2018	flowering	Pisum sativum	Gali et al.	2108	10.1186/s12870-018-1368-4	QTL
Sallam et al. 2016	cold stress	Vicia faba	Sallam et al.	2016	10.3389/fpls.2016.01098	QTL
Aguilar-Benitez et al. 2021	flowering	Vicia faba	Aguilar-Benitez et al.	2021	10.1186/s12870-018-1368-4	QTL
PRJNA474098	water stress	Lens culinaris	Morgil et al.	2019	doi.org/10.1007/s10142-019-00675-2	RNA-seq
PRJNA715852	water stress	Lens culinaris	Kumar et al.	2021	doi.org/10.1111/ppl.13419	RNA-seq
PRJNA693582	flowering	Lens culinaris	Yuan et al.	2022	10.3389/fgene.2022.891702	RNA-seq
PRJNA487169	flowering	Medicago truncatula	Thomson et al.	2019	doi.org/10.7717/peerj.6626	RNA-seq
PRJNA649443	flowering	Medicago truncatula	Cheng et al.	2020	10.1093/plphys/kiaa005	RNA-seq
PRJNA674307	heat stress	Medicago truncatula	Chen et al.	2021	10.1016/j.dib.2021.106726	RNA-seq
PRJNA517587	water and sulfur stress	Pisum sativum	Henriet et al.	2019	doi.org/10.1093/jxb/erz114	RNA-seq
PRJNA543764	cold stress	Pisum sativum	Bahrman et al.	2019	doi.org/10.3390/plants8080288	RNA-seq
PRJNA267198	gene atlas	Pisum sativum	Alves-Carvalho et al.	2015	doi.org/10.1111/tpj.12967	RNA-seq
PRJNA400674	water stress	Vicia faba	Khan et al.	2019	doi.org/10.1016/j.ejbt.2019.02.004	RNA-seq
PRJNA611089	water stress	Vicia faba	Wu et al.	2020	doi.org/10.1007/s13205-020-02374-3	RNA-seq
PRJNA395480	gene atlas	Vicia faba	Braich et al.	2017	10.3390/agronomy7030053	RNA-seq
PRJNA725986	gene atlas	Vicia faba	Jayakodi et al.	2023	10.1038/s41586-023-05791-5	RNA-seq
PRJNA276314	bruchids	Vigna radiata	Liu et al.	2016	doi.org/10.1186/s12870-016-0736-1	RNA-seq
PRJNA771920	water stress	Vigna radiata	Zhao et al.	2022	doi.org/10.1186/s12864-022-08315-z	RNA-seq
