# Supplementary material for: Development of a knowledge graph framework to ease and empower translational approaches in plant research: a use-case on grain legumes
Source: Front Artif Intell. 2023 Aug 3;6:1191122. doi: 10.3389/frai.2023.1191122 (PMC10435283; doi:10.3389/frai.2023.1191122)
Supplement: Supplementary file 2 [file Table_2.xlsx]

## Sheet: Sheet1
Table S2: Description of node properties included in the Ortho_KB model. The “mandatory“ column indicates whether the property must be present for each imported node, the “is_import_id” whether the property is the one used for the import and therefore should be unique. Finally, the “is_indexed” indicates if an index was applied for this property. For these columns, “T” indicates True and “F” False
node_label	property	property_type	general_comment	mandatory	is_import_id	is_indexed	additional_label	additional_label_comment
Species	ncbi_taxon_id	string	species taxon number from ncbi	T	T	F
Species	genus	string	genus of the species	F	F	F
Species	species	string	species full name	F	F	F
Accession	accession_id	string	accession identifier	F	T	F
Genome	genome_id	string	genome identifier used in pipeline input files (e.g. psat), same as genome_id from Genome node.	T	T	F
Genome	assembly_v	string	assembly version number	F	F	F
Genome	annotation_v	string	annotation version number	F	F	F
Chromosome	chromosome_id	string	chromosome identifier	T	T	T
Chromosome	original_name	string	chromosome name in the gff file	F	F	F
Gene	gene_id	string		T	T	T
Gene	genome	string	genome identifier used in pipeline input files (e.g. psat), same as genome_id from Genome node. Maintained as property to simplify query construction	F	F	F
Gene	chromosome	string	current chromosome name	T	F	F
Gene	old_chr	string	chromosome name from the initial genome files	F	F	F
Gene	strand	string	either - or +	F	F	F
Gene	start	long	integer of the start position	T	F	F
Gene	stop	long	integer of the stop position	T	F	F
Gene	eggNOG_desc	string	gene function description provided by eggNOG annotation	F	F	F
Gene	eggNOG_symbol	string	gene symbol obtained by eggNOG annotation (e.g. ELF3)	F	F	F
RNA	rna_id	string	RNA identifier (same as the protein_id)	T	T	T
RNA	ncbi_taxon_id	string	species taxon number from ncbi	F	F	F
RNA	length	long	length of the transcript in nucleotides	T	F	F
Protein	protein_id	string	protein identifier (same as the rna_id)	T	T	T
Protein	ncbi_taxon_id	string	species taxon number from ncbi	?	F	F
Protein	length	string	length of the protein in nucleotides	T	F	F
Homology;Orthogroup	orthogroup_id	string	group of genes descending from a single gene in the last common ancestor of considered species	T	T	T
Homology;Orthogroup	sp_count	long	number of genomes included in the orthogroup	T	F	F
Homology;Protocol	protocol_id	string	only one node of this category (id: orthology_protocol)	T	T	F
Homology;Protocol	software	string	software used for orthogroups inference (OrthoFinder)	T	F	F
Homology;Protocol	version	string	version of OrthoFinder used	T	F	F
Homology;Protocol	params	string	parameters used for orthogroups inference	T	F	F
Homology;Protocol	species	string	semi-colon delimited list of species acronym included in the analysis. They should match genome_id	T	F	F
Homology;Protocol	date	string	date at which the analysis was performed	T	F	F
Synteny;Block	block_id	string	syntenic block identifier	T	T	T	Inter/Intra	optional label inter/intra depending if the synteny block is intra or inter-species
Synteny;Block	chrA	string	one of the two chromosomes where synteny is observed	T	F	F	Inter/Intra	optional label inter/intra depending if the synteny block is intra or inter-species
Synteny;Block	chrB	string	one of the two chromosomes where synteny is observed	T	F	F	Inter/Intra	optional label inter/intra depending if the synteny block is intra or inter-species
Synteny;Block	flipped	string	if the region is flipped between the two chromosomes	T	F	F	Inter/Intra	optional label inter/intra depending if the synteny block is intra or inter-species
Synteny;Block	nb_genes	long	number of gene pairs belonging to the synteny block	T	F	F	Inter/Intra	optional label inter/intra depending if the synteny block is intra or inter-species
Synteny;Block	score	double	score assigned to the block by MCScanX	T	F	F	Inter/Intra	optional label inter/intra depending if the synteny block is intra or inter-species
Synteny;Block	evalue	double	evalue assigned to the block by MCScanX	T	F	F	Inter/Intra	optional label inter/intra depending if the synteny block is intra or inter-species
Synteny;Protocol	protocol_id	string	synteny protocol identifier	T	T	F
Synteny;Protocol	match_score	long	match score parameter for the run	T	F	F
Synteny;Protocol	match_size	long	match size parameter for the run	T	F	F
Synteny;Protocol	max_gaps	long	max gaps parameter for the run	T	F	F
Synteny;Protocol	gap_penalty	double	gap penalty parameter for the run	T	F	F
Synteny;Protocol	overlap_window	long	overlap window parameter for the run	T	F	F
Synteny;Protocol	evalue	float	evalue parameter for the run	T	F	F
Synteny;Protocol	number_of_all_genes	long	number of genes submitted	T	F	F
Synteny;Protocol	software	string	MCScanX	T	F	F
Synteny;Protocol	number_of_collinear_genes	long	number of genes found to be part of collinear blocks	T	F	F
Synteny;Protocol	percentage	float	percentage of collinear genes among all genes	T	F	F
FunctionalAnnotation;InterPro	annotation_id	string	annotation identifier from InterPro	T	T	T
FunctionalAnnotation;InterPro	description	string	short description of the annotation	T	F	F
FunctionalAnnotation;InterPro	source	string	source from which InterPro pulled data	T	F	F
FunctionalAnnotation;InterPro	link	string	link to embl-ebi	F	F	F
FunctionalAnnotation;Trapid	family_id	string	gene family identifier	T	T	F	GeneFamily/RNAFamily
FunctionalAnnotation;Trapid	source	string	source of the annotation files	F	F	F	GeneFamily/RNAFamily
FunctionalAnnotation;Trapid	link	string	corresponding link to the PLAZA database	F	F	F	GeneFamily/RNAFamily
QTL;Dataset	dataset_id	string	dataset identifier	T	T	F
QTL;Dataset	doi	string	doi of the associated publication	F	F	F
QTL	qtl_id	string	qtl identifier	T	T	T	Biparental/DiversityPanel
QTL	species	string	species involved	T	F	F	Biparental/DiversityPanel
QTL	year	string	year of the study	F	F	F	Biparental/DiversityPanel
QTL	lod	double	lod score for the QTL	F	F	F	Biparental/DiversityPanel
QTL	pvalue	double	pvalue for the QTL	F	F	F	Biparental/DiversityPanel
QTL	additive	double	additive value for the QTL	F	F	F	Biparental/DiversityPanel
QTL	r2	double	r2 for the QTL	F	F	F	Biparental/DiversityPanel
QTL	linkage_group	string	genetic linkage group on which the QTL was found	F	F	F	Biparental/DiversityPanel
QTL	chromosome	string	chromosome related to the linkage group	T	F	F	Biparental/DiversityPanel
QTL	peakmarker_id	string	peak marker identifier	F	F	F	Biparental/DiversityPanel
QTL	peakmarker_genetpos	double	associated genetic position of the peak marker	F	F	F	Biparental/DiversityPanel
QTL	peakmarker_start	long	peak marker start on the chromosome	T/F	F	F	Biparental/DiversityPanel
QTL	peakmarker_end	long	peak marker end on the chromosome	T/F	F	F	Biparental/DiversityPanel
QTL	leftmarker_id	string	left marker identifier	F	F	F	Biparental
QTL	leftmarker_genetpos	double	associated genetic position of the left marker	F	F	F	Biparental
QTL	leftmarker_start	long	left marker start on the chromosome	T	F	F	Biparental
QTL	leftmarker_end	long	left marker end on the chromosome	T	F	F	Biparental
QTL	rightmarker_id	string	right marker identifier	F	F	F	Biparental
QTL	rightmarker_genetpos	double	associated genetic position of the right marker	F	F	F	Biparental
QTL	rightmarker_start	long	right marker start on the chromosome	T	F	F	Biparental
QTL	rightmarker_end	long	right marker end on the chromosome	T	F	F	Biparental
Population	population_id	string	population identifier	T	T	F
Trait	trait_id	string	trait identifier, a short description (to replace later by an ontology term)	T	T	F
Site	site_id	string	where the experiment took place	T	T	F
RNASeq;Dataset	dataset_id	string	dataset identifier	T	T	F
RNASeq;Dataset	title	string	title of the dataset (can be the one given on NCBI)	F	F	F
RNASeq;Dataset	species	string	species involved in the experiment	F	F	F
RNASeq;Dataset	year	int	year of the publication	F	F	F
RNASeq;Dataset	author	string	first author of the publication	F	F	F
RNASeq;Dataset	contact	string	contact author	F	F	F
RNASeq;Dataset	doi	string	doi of the associated publication	F	F	F
RNASeq;Dataset	abstract	string	abstract from the publication	F	F	F
RNASeq;Protocol	protocol_id	string	protocol identifier	T	T	F
RNASeq;Protocol	metadata_collection	string	tool used for metadata collection for published data	F	F	F
RNASeq;Protocol	metadata_collection_v	string	version of the tool used for metadata collection for published data	F	F	F
RNASeq;Protocol	rnaseq_processing	string	tool used for metadata collection for published data	F	F	F
RNASeq;Protocol	rnaseq_processing_v	string	version of the tool used for metadata collection for published data	F	F	F
RNASeq;Protocol	mapping	string	tool used for mapping reads	F	F	F
RNASeq;Protocol	mapping_v	string	version of the tool used for mapping reads	F	F	F
RNASeq;Protocol	gene_aggregation	string	tool used for the gene aggregation	F	F	F
RNASeq;Condition	condition_id	string	condition identifier (manually affected by the user)	T	T	F
RNASeq;Condition	replicate_count	int	number of replicates included in the condition	F	F	F
RNASeq;Sample	sample_id	string	sample identifier	T	T	F
RNASeq;Sample	strandedness	string	rna-seq library strandedness according to salmon	T	F	F
RNASeq;Sample	study_accession	string	accession number of the ncbi experiment	F	F	F
RNASeq;Sample	library_layout	string	either single or paired end	F	F	F
RNASeq;Sample	instrument_model	string	model of sequencer used	F	F	F
RNASeq;Sample	instrument_platform	string	plateform of the sequencer (eg. Illumina)	F	F	F
RNASeq;Sample	read_count	long	total read count for the sample	F	F	F
RNASeq;Sample	sample_title	string	sample title entered by the authors on NCBI	F	F	F
RNASeq;Sample	experiment_title	string	experiment title from the NCBI with some additional information	F	F	F
Resource;Class;PO	uri	string	imported with n10s; link sends to Ontobee	T	F	F	NCBITaxon/PECO/CARO
Resource;Class;PO	name	string	ontology term common name	T	F	F	NCBITaxon/PECO/CARO
Resource;Class;PO	label	string	ontology term description	F	F	F
Resource;Class;PO	comment	string	optional advice on when to use this term	F	F	F
Resource;Class;PECO	uri	string	imported with n10s; link sends to Ontobee	T	F	F	EO/PCO/ENVO/PATO/BFO/NCBITaxon/PECO/CARO/CHEBI
Resource;Class;PECO	name	string	ontology term common name	T	F	F
Resource;Class;PECO	label	string	ontology term description	F	F	F
Resource;Class;PECO	comment	string	optional advice on when to use this term	F	F	F
