# Supplementary material for: Development of a knowledge graph framework to ease and empower translational approaches in plant research: a use-case on grain legumes
Source: Front Artif Intell. 2023 Aug 3;6:1191122. doi: 10.3389/frai.2023.1191122 (PMC10435283; doi:10.3389/frai.2023.1191122)
Supplement: Supplementary file 3 [file Table_3.xlsx]

## Sheet: Sheet1
Table S3: Description of relationships connecting nodes (from Table S1) with their associated properties. The “mandatory“ column indicates whether the property must be present for each imported relationship. Finally, the “is_indexed” indicates if an index was applied for this property. For these columns, “T” indicates True and “F” False.
start_node	end_node	relationship type	property	property_type	general comment	mandatory	is_indexed	start_node_additional_label	end_node_additional_label
Accession	Species	PART_OF				T	F
Genome	Accession	PART_OF				T	F
Chromosome	Genome	PART_OF
Gene	Chromosome	LOCATED_ON
Gene	RNA	HAS_TRANSCRIPT				F	F
Gene	Homology;Orthogroup	PART_OF				F	F
Gene	Gene	ORTHOLOG_TO				F	F
Gene	RNASeq;Condition	IS_EXPRESSED	geom_mean	float	geometric mean of the counts	T	F
Gene	RNASeq;Condition	IS_EXPRESSED	geom_sd	float	geometric standard deviation	T	F
Gene	RNASeq;Condition	IS_EXPRESSED	arith_mean	float	arithmetic mean of the counts	T	F
Gene	RNASeq;Condition	IS_EXPRESSED	arith_sd	float	arithmetic standard deviation	T	F
Gene	RNASeq;Condition	IS_EXPRESSED	normalization_method	string	method employed to normalize counts (e.g. TPM)	T	F
Gene	RNASeq;Sample	IS_EXPRESSED	normalized_count	float	normalized count	T	F
Gene	RNASeq;Sample	IS_EXPRESSED	count	float	raw count	T	F
Gene	RNASeq;Sample	IS_EXPRESSED	normalization_method	string	method employed to normalize counts (e.g. TPM)	T	F
Gene	Synteny;Block	PART_OF	evalue	double	evalue associated to the gene pair	T	F		Inter/Intra
Gene	Synteny;Block	PART_OF	gene_pair	long	gene pair number in the MCScanX file	T	F		Inter/Intra
Gene	Synteny;Block	LOCATED_IN			special relationship to include tandem duplicated genes from MCScanX tandem file (these genes are excluded from the synteny file)	F	F
Gene	QTL	COLOCALIZES_WITH			linking all genes included in the confidence interval of the QTL	F	F		Biparental/DiversityPanel
Gene	QTL	IS_CLOSEST_TO_PEAK	distance_to_peak	long	relationship only occurring for the gene that is the closest to the peak marker of the QTL	F	F		Biparental/DiversityPanel
Gene	FunctionalAnnotation;GeneFamily;Trapid	HAS_ANNOTATION					F		GeneFamily/RNAFamily
Inter;Synteny;Block	Protocol;Synteny	PROCESSED_WITH					F
Orthogroup;Homology	Homology;Protocol	PROCESSED_WITH					F
Protein	FunctionalAnnotation;InterPro	HAS_ANNOTATION	date		date of the run; on rel since nodes imported through n10s		F
Protein	FunctionalAnnotation;InterPro	HAS_ANNOTATION	start		start of the domain on the prot	T	F
Protein	FunctionalAnnotation;InterPro	HAS_ANNOTATION	stop		end of the domain on the prot	T	F
QTL	QTL;Dataset	PART_OF					F	Biparental/DiversityPanel
QTL	Trait	CORRELATES_WITH					F		Biparental/DiversityPanel
QTL;Dataset	Site	PART_OF					F
QTL;Dataset	Population	PART_OF					F
Resource;Class	Resource;Class	SCO					F
RNA	Resource;Class;GO	HAS_ANNOTATION	source	string	e.g. TRAPID	T	F		PECO
RNA	Resource;Class;MapMan	HAS_ANNOTATION				T	F
RNASeq;Condition	RNASeq;Dataset	PART_OF					F
RNASeq;Condition	Resource;Class;PO	HAS_DEV_STAGE					F
RNASeq;Condition	Resource;Class;PO	IS_TISSUE					F
RNASeq;Condition	Resource;Class;PECO	HAS_LOCATION					F
RNASeq;Condition	Resource;Class;PECO	SUBJECTED_TO					F		CHEBI
RNASeq;Dataset	RNASeq;Protocol	PROCESSED_WITH					F
RNASeq;Sample	RNASeq;Condition	BELONGS_TO					F
Synteny;Block	Chromosome	LOCATED_ON	start	long	start of the block on the chromosome (start of the most left gene)	F	F
Synteny;Block	Chromosome	LOCATED_ON	end	long	end of the block on the chromosome (end of the most right gene)	F	F
RNA	Protein	HAS_PRODUCT					F
