# Supplementary material for: Development of a knowledge graph framework to ease and empower translational approaches in plant research: a use-case on grain legumes
Source: Front Artif Intell. 2023 Aug 3;6:1191122. doi: 10.3389/frai.2023.1191122 (PMC10435283; doi:10.3389/frai.2023.1191122)
Supplement: Supplementary file 4 [file Table_4.xlsx]

## Sheet: Sheet1
Table S4: List of nodes stored in OrthoLegKB along with their respective count
node_labels	count
[RNASeq,Sample]	301
[FunctionalAnnotation,GeneFamily,Trapid]	10787
[RNASeq,Condition]	145
[RNASeq,Protocol]	1
[Inter,Synteny,Block]	1984
[Synteny,Block,Intra]	22
[FunctionalAnnotation,InterPro]	40573
[QTL,Dataset]	9
[Trait]	33
[RNA]	230950
[Genome]	5
[Gene]	222797
[Orthogroup,Homology]	29405
[Homology,Protocol]	1
[RNASeq,Dataset]	15
[Free]	45
[Protein]	212898
[Accession]	5
[Site]	14
[QTL,Biparental]	161
[QTL,DiversityPanel]	87
[Species]	5
[Population]	15
[FunctionalAnnotation,Trapid,RNAFamily]	7
[Chromosome]	5219
[Protocol,Synteny]	1
[_GraphConfig]	1
[Resource,Class,PO,NCBITaxon,PECO,CARO]	2
[Resource,Class,PO]	1991
[Resource]	45
[Resource,Relationship]	21
[Resource,PECO,BFO]	12
[Resource,PECO,CHEBI]	1499
[Resource,NCBITaxon,PECO,CARO]	259
[Resource,PECO,PCO]	6
[Resource,PECO,ENVO]	124
[Resource,PECO,PATO]	26
[Resource,Class,PECO,EO]	574
[Resource,Class,PECO]	570
[Resource,Class,PECO,GO]	6
[Resource,PECO,FOODON]	1
[Resource,PECO,RO]	2
[Resource,Class,MapMan]	7601
[Resource,Class,GO]	51154
TOTAL	819379
