# Supplementary material for: Development of a knowledge graph framework to ease and empower translational approaches in plant research: a use-case on grain legumes
Source: Front Artif Intell. 2023 Aug 3;6:1191122. doi: 10.3389/frai.2023.1191122 (PMC10435283; doi:10.3389/frai.2023.1191122)
Supplement: Supplementary file 5 [file Table_5.xlsx]

## Sheet: Sheet1
Table S5: QTL included in syntenic blocks encompassing the FT locus in V. faba, P. sativum, M. truncatula and L. culinaris
qtl_id	chr	start	end
PR15_26_1	Ps03	120704	113840365
DTF3 _1	Ps03	190458976	190459045
DTF3 _3	Ps03	199418986	199419055
DF50_09-10(2)_1	Vf05	604227199	604227199
DF1_07-08(3)_1	Vf05	604227199	604227199
DF1_06-07(2)_1	Vf05	604227199	604227199
qDTF.6-2_1	Lc06	308012569	314373613
qDTFL-6A_1	Lc06	294069348	301233901
