# Supplementary material for: Development of a knowledge graph framework to ease and empower translational approaches in plant research: a use-case on grain legumes
Source: Front Artif Intell. 2023 Aug 3;6:1191122. doi: 10.3389/frai.2023.1191122 (PMC10435283; doi:10.3389/frai.2023.1191122)
Supplement: Supplementary file 6 [file Table_6.xlsx]

## Sheet: Sheet1
Table S6: Expression of FT genes for the integrated RNA-seq datasets. The “tpm_count” column indicates the expression of the gene in the sample (“sample_id“), in TPM
gene_id	sample_id	condition_id	tpm_count	annotation
Lcu.2RBY.6g043850	SRX9908600	PRJNA693582_c17	2.96925	leaf
Lcu.2RBY.6g043850	SRX9908597	PRJNA693582_c10	27.138	leaf
Lcu.2RBY.6g043850	SRX9908603	PRJNA693582_c20	3.86349	leaf
Lcu.2RBY.6g043850	SRX9908587	PRJNA693582_c19	15.9022	leaf
Lcu.2RBY.6g043850	SRX9908596	PRJNA693582_c9	25.6532	leaf
Lcu.2RBY.6g043850	SRX9908599	PRJNA693582_c12	14.9627	leaf
Lcu.2RBY.6g043850	SRX9908590	PRJNA693582_c3	25.6553	leaf
Lcu.2RBY.6g043850	SRX9908578	PRJNA693582_c15	3.79048	leaf
Lcu.2RBY.6g043850	SRX9908581	PRJNA693582_c13	2.08295	leaf
Lcu.2RBY.6g043850	SRX9908593	PRJNA693582_c6	11.8051	leaf
Lcu.2RBY.6g043850	SRX9908602	PRJNA693582_c19	15.2951	leaf
Lcu.2RBY.6g043850	SRX9908595	PRJNA693582_c8	16.2072	leaf
Lcu.2RBY.6g043850	SRX9908571	PRJNA693582_c6	11.1441	leaf
Lcu.2RBY.6g043850	SRX9908598	PRJNA693582_c11	21.5973	leaf
Lcu.2RBY.6g043850	SRX9908586	PRJNA693582_c18	5.00571	leaf
Lcu.2RBY.6g043850	SRX9908592	PRJNA693582_c5	7.37164	leaf
Lcu.2RBY.6g043850	SRX9908601	PRJNA693582_c18	25.4948	leaf
Lcu.2RBY.6g043850	SRX9908577	PRJNA693582_c12	23.7038	leaf
Lcu.2RBY.6g043850	SRX9908580	PRJNA693582_c2	1.65328	leaf
Lcu.2RBY.6g043850	SRX9908583	PRJNA693582_c15	2.11849	leaf
Lcu.2RBY.6g043850	SRX9908574	PRJNA693582_c9	46.3119	leaf
Lcu.2RBY.6g043850	SRX9908594	PRJNA693582_c7	12.6093	leaf
Lcu.2RBY.6g043850	SRX9908570	PRJNA693582_c5	11.4164	leaf
Lcu.2RBY.6g043850	SRX9908568	PRJNA693582_c3	6.60527	leaf
Lcu.2RBY.6g043850	SRX9908588	PRJNA693582_c20	0.959357	leaf
Lcu.2RBY.6g043850	SRX9908591	PRJNA693582_c4	11.0882	leaf
Lcu.2RBY.6g043850	SRX9908585	PRJNA693582_c17	1.24823	leaf
Lcu.2RBY.6g043850	SRX9908582	PRJNA693582_c14	2.60198	leaf
Lcu.2RBY.6g043850	SRX9908565	PRJNA693582_c19	4.94061	leaf
Lcu.2RBY.6g043850	SRX9908576	PRJNA693582_c11	11.4293	leaf
Lcu.2RBY.6g043850	SRX9908573	PRJNA693582_c8	18.425	leaf
Lcu.2RBY.6g043850	SRX9908549	PRJNA693582_c6	10.1929	leaf
Lcu.2RBY.6g043850	SRX9908567	PRJNA693582_c14	0.356471	leaf
Lcu.2RBY.6g043850	SRX9908558	PRJNA693582_c2	3.06333	leaf
Lcu.2RBY.6g043850	SRX9908546	PRJNA693582_c3	14.614	leaf
Lcu.2RBY.6g043850	SRX9908561	PRJNA693582_c15	0.601465	leaf
Lcu.2RBY.6g043850	SRX9908564	PRJNA693582_c18	8.35665	leaf
Lcu.2RBY.6g043850	SRX9908569	PRJNA693582_c4	15.4355	leaf
Lcu.2RBY.6g043850	SRX9908575	PRJNA693582_c10	21.2094	leaf
Lcu.2RBY.6g043850	SRX9908555	PRJNA693582_c12	29.5602	leaf
Lcu.2RBY.6g043850	SRX9908572	PRJNA693582_c7	9.62014	leaf
Lcu.2RBY.6g043850	SRX9908548	PRJNA693582_c5	10.1875	leaf
Lcu.2RBY.6g043850	SRX9908552	PRJNA693582_c9	28.3763	leaf
Lcu.2RBY.6g043850	SRX9908566	PRJNA693582_c20	15.1211	leaf
Lcu.2RBY.6g043850	SRX9908563	PRJNA693582_c17	3.44291	leaf
Lcu.2RBY.6g043850	SRX9908560	PRJNA693582_c14	0.444952	leaf
Lcu.2RBY.6g043850	SRX9908545	PRJNA693582_c2	2.17652	leaf
Lcu.2RBY.6g043850	SRX9908554	PRJNA693582_c11	19.8514	leaf
Lcu.2RBY.6g043850	SRX9908551	PRJNA693582_c8	15.4695	leaf
Lcu.2RBY.6g043850	SRX9908547	PRJNA693582_c4	10.0348	leaf
Lcu.2RBY.6g043850	SRX9908559	PRJNA693582_c13	2.59018	leaf
Lcu.2RBY.6g043850	SRX9908553	PRJNA693582_c10	30.9093	leaf
Lcu.2RBY.6g043850	SRX9908550	PRJNA693582_c7	11.8582	leaf
Lcu.2RBY.6g043850	SRX10432711	PRJNA715852_c3	26.8686	leaf
Lcu.2RBY.6g043850	SRX10432708	PRJNA715852_c3	3.94177	leaf
Lcu.2RBY.6g043850	SRX10432707	PRJNA715852_c2	21.7915	leaf
Lcu.2RBY.6g043850	SRX10432713	PRJNA715852_c2	26.3511	leaf
Lcu.2RBY.6g043850	SRX10432710	PRJNA715852_c4	23.1666	leaf
Lcu.2RBY.6g043850	SRX10432712	PRJNA715852_c1	8.06822	leaf
Lcu.2RBY.6g043850	SRX10432706	PRJNA715852_c1	8.66519	leaf
Lcu.2RBY.6g043850	SRX10432709	PRJNA715852_c4	20.446	leaf
Psat3g090720	SRX977878	PRJNA267198_c18	0.050336	legume fruit
Psat3g090720	SRX977922	PRJNA267198_c20	0.034992	seed
Psat3g090720	SRX769790	PRJNA267198_c15	275.727	peduncle
Psat3g090720	SRX769753	PRJNA267198_c10	2.41934	compound leaf
Psat3g090720	SRX769787	PRJNA267198_c12	36.3403	compound leaf
Psat3g090720	SRX977877	PRJNA267198_c17	0.480348	flower
Psat3g090720	SRX768287	PRJNA267198_c9	0.215269	vegetative shoot system
Psat3g090720	SRX977910	PRJNA267198_c19	0.11144	seed
Psat3g090720	SRX769789	PRJNA267198_c14	133.953	stem
Psat3g090720	SRX769757	PRJNA267198_c11	15.9438	compound leaf
Psat3g090720	SRX768286	PRJNA267198_c8	0.25412	vegetative shoot system
Psat3g090720	SRX816181	PRJNA267198_c16	0.162575	flower
Psat3g090720	SRX769788	PRJNA267198_c13	46.0525	leaf tendril
MtrunA17Chr7_39606925_39618489	SRX8843411	PRJNA649443_c7	0.418382	vegetative shoot apex
MtrunA17Chr7_39606925_39618489	SRX8843403	PRJNA649443_c5	0.683178	vegetative shoot apex
MtrunA17Chr7_39606925_39618489	SRX8843410	PRJNA649443_c7	0.286469	vegetative shoot apex
MtrunA17Chr7_39606925_39618489	SRX8843408	PRJNA649443_c4	0.103187	reproductive shoot apex
MtrunA17Chr7_39606925_39618489	SRX4594583	PRJNA487169_c5	5.86492	compound leaf
MtrunA17Chr7_39606925_39618489	SRX8843400	PRJNA649443_c3	0.477978	reproductive shoot apex
MtrunA17Chr7_39606925_39618489	SRX8843405	PRJNA649443_c6	0.558693	vegetative shoot apex
MtrunA17Chr7_39606925_39618489	SRX8843409	PRJNA649443_c4	0.103187	reproductive shoot apex
MtrunA17Chr7_39606925_39618489	SRX8843407	PRJNA649443_c7	2.42682	vegetative shoot apex
MtrunA17Chr7_39606925_39618489	SRX8843402	PRJNA649443_c5	0.149086	vegetative shoot apex
MtrunA17Chr7_39606925_39618489	SRX4594577	PRJNA487169_c3	6.06324	compound leaf
MtrunA17Chr7_39606925_39618489	SRX8843397	PRJNA649443_c3	0.812562	reproductive shoot apex
MtrunA17Chr7_39606925_39618489	SRX8843392	PRJNA649443_c1	1.88852	reproductive shoot apex
MtrunA17Chr7_39606925_39618489	SRX4594580	PRJNA487169_c4	3.19872	compound leaf
MtrunA17Chr7_39606925_39618489	SRX4594582	PRJNA487169_c5	7.9745	compound leaf
MtrunA17Chr7_39606925_39618489	SRX4594574	PRJNA487169_c2	0.098099	compound leaf
MtrunA17Chr7_39606925_39618489	SRX8843399	PRJNA649443_c4	0.445234	reproductive shoot apex
MtrunA17Chr7_39606925_39618489	SRX8843394	PRJNA649443_c2	0.084539	vegetative shoot apex
MtrunA17Chr7_39606925_39618489	SRX8843406	PRJNA649443_c6	0.342817	vegetative shoot apex
MtrunA17Chr7_39606925_39618489	SRX4594576	PRJNA487169_c3	3.58951	compound leaf
MtrunA17Chr7_39606925_39618489	SRX8843401	PRJNA649443_c5	0.236285	vegetative shoot apex
MtrunA17Chr7_39606925_39618489	SRX8843396	PRJNA649443_c2	0.461571	vegetative shoot apex
MtrunA17Chr7_39606925_39618489	SRX4594579	PRJNA487169_c4	3.03809	compound leaf
MtrunA17Chr7_39606925_39618489	SRX4594571	PRJNA487169_c1	0.093949	compound leaf
MtrunA17Chr7_39606925_39618489	SRX8843391	PRJNA649443_c1	2.19294	reproductive shoot apex
MtrunA17Chr7_39606925_39618489	SRX8843393	PRJNA649443_c1	1.36029	reproductive shoot apex
MtrunA17Chr7_39606925_39618489	SRX8843398	PRJNA649443_c3	0.077958	reproductive shoot apex
MtrunA17Chr7_39606925_39618489	SRX4594584	PRJNA487169_c6	0.152917	compound leaf
MtrunA17Chr7_39606925_39618489	SRX4594581	PRJNA487169_c5	11.0242	compound leaf
MtrunA17Chr7_39606925_39618489	SRX4594578	PRJNA487169_c4	2.01947	compound leaf
MtrunA17Chr7_39606925_39618489	SRX4594575	PRJNA487169_c3	6.60215	compound leaf
MtrunA17Chr7_39606925_39618489	SRX4594570	PRJNA487169_c1	0.107436	compound leaf
MtrunA17Chr7_39606925_39618489	SRX4594569	PRJNA487169_c1	0.093198	compound leaf
Vfaba.Hedin2.R1.5g087000	SRX4909505	PRJNA395480_c14	0.030957	stem
Vfaba.Hedin2.R1.5g087000	SRX4909502	PRJNA395480_c11	0.362973	legume fruit
Vfaba.Hedin2.R1.5g087000	SRX4909499	PRJNA395480_c8	0.131712	leaf
Vfaba.Hedin2.R1.5g087000	SRX4909496	PRJNA395480_c5	0.265213	flower
Vfaba.Hedin2.R1.5g087000	SRX4909494	PRJNA395480_c3	1.46146	seed
Vfaba.Hedin2.R1.5g087000	SRX4909501	PRJNA395480_c10	1.5043	legume fruit
Vfaba.Hedin2.R1.5g087000	SRX4909498	PRJNA395480_c7	4.53453	stem
Vfaba.Hedin2.R1.5g087000	SRX4909493	PRJNA395480_c2	0.045079	legume fruit
Vfaba.Hedin2.R1.5g087000	SRX4909503	PRJNA395480_c12	0.613675	seed
Vfaba.Hedin2.R1.5g087000	SRX4909495	PRJNA395480_c4	1.07938	flower
Vfaba.Hedin2.R1.5g087000	SRX4909500	PRJNA395480_c9	0.041099	leaf
Vfaba.Hedin2.R1.5g087000	SRX4909492	PRJNA395480_c1	2.8477	legume fruit
Vfaba.Hedin2.R1.5g087000	SRX10708491	PRJNA725986_c10	1.0756	juvenile vascular leaf
Vfaba.Hedin2.R1.5g087000	SRX10708489	PRJNA725986_c9	30.2607	stem
Vfaba.Hedin2.R1.5g087000	SRX10708477	PRJNA725986_c5	30.1681	legume fruit
Vfaba.Hedin2.R1.5g087000	SRX10708493	PRJNA725986_c2	59.1709	adult vascular leaf
Vfaba.Hedin2.R1.5g087000	SRX10708471	PRJNA725986_c4	0.112273	transition vascular leaf
Vfaba.Hedin2.R1.5g087000	SRX10708488	PRJNA725986_c9	34.1183	stem
Vfaba.Hedin2.R1.5g087000	SRX10708474	PRJNA725986_c5	39.9532	legume fruit
Vfaba.Hedin2.R1.5g087000	SRX10708468	PRJNA725986_c3	3.50225	legume fruit
Vfaba.Hedin2.R1.5g087000	SRX10708476	PRJNA725986_c1	4.36456	flower
Vfaba.Hedin2.R1.5g087000	SRX10708492	PRJNA725986_c10	1.17807	juvenile vascular leaf
Vfaba.Hedin2.R1.5g087000	SRX10708490	PRJNA725986_c10	1.88628	juvenile vascular leaf
Vfaba.Hedin2.R1.5g087000	SRX10708470	PRJNA725986_c3	5.16822	legume fruit
Vfaba.Hedin2.R1.5g087000	SRX10708473	PRJNA725986_c4	0.379049	transition vascular leaf
Vfaba.Hedin2.R1.5g087000	SRX10708465	PRJNA725986_c1	2.77718	flower
Vfaba.Hedin2.R1.5g087000	SRX10708478	PRJNA725986_c6	0.269831	seed
Vfaba.Hedin2.R1.5g087000	SRX10708487	PRJNA725986_c9	19.8669	stem
Vfaba.Hedin2.R1.5g087000	SRX10708467	PRJNA725986_c2	40.018	adult vascular leaf
Vfaba.Hedin2.R1.5g087000	SRX10708475	PRJNA725986_c5	40.8637	legume fruit
Vfaba.Hedin2.R1.5g087000	SRX10708464	PRJNA725986_c1	3.39186	flower
Vfaba.Hedin2.R1.5g087000	SRX10708472	PRJNA725986_c4	0.631512	transition vascular leaf
Vfaba.Hedin2.R1.5g087000	SRX10708469	PRJNA725986_c3	6.7234	legume fruit
Vfaba.Hedin2.R1.5g087000	SRX10708466	PRJNA725986_c2	33.9893	adult vascular leaf
Psat3g090680	SRX5504167	PRJNA517587_c4	3.32893	seed
Psat3g090680	SRX5504169	PRJNA517587_c4	5.73997	seed
Psat3g090680	SRX5504164	PRJNA517587_c2	6.84497	seed
Psat3g090680	SRX5504161	PRJNA517587_c2	5.04212	seed
Psat3g090680	SRX5504158	PRJNA517587_c1	8.96133	seed
Psat3g090680	SRX5504166	PRJNA517587_c4	5.31781	seed
Psat3g090680	SRX5914446	PRJNA543764_c10	1.54574	vegetative shoot system
Psat3g090680	SRX5504163	PRJNA517587_c3	5.21386	seed
Psat3g090680	SRX5504157	PRJNA517587_c1	6.81399	seed
Psat3g090680	SRX5914440	PRJNA543764_c5	13.045	vegetative shoot system
Psat3g090680	SRX5504168	PRJNA517587_c4	6.23929	seed
Psat3g090680	SRX5914434	PRJNA543764_c8	0.620809	vegetative shoot system
Psat3g090680	SRX5504160	PRJNA517587_c2	5.99195	seed
Psat3g090680	SRX5914425	PRJNA543764_c1	0.149318	vegetative shoot system
Psat3g090680	SRX5504165	PRJNA517587_c3	7.40483	seed
Psat3g090680	SRX5914431	PRJNA543764_c12	1.6888	vegetative shoot system
Psat3g090680	SRX5914445	PRJNA543764_c10	1.02859	vegetative shoot system
Psat3g090680	SRX5914443	PRJNA543764_c11	1.45532	vegetative shoot system
Psat3g090680	SRX5504162	PRJNA517587_c3	6.37277	seed
Psat3g090680	SRX5914428	PRJNA543764_c4	1.90563	vegetative shoot system
Psat3g090680	SRX5504159	PRJNA517587_c1	5.6179	seed
Psat3g090680	SRX5914439	PRJNA543764_c5	16.5958	vegetative shoot system
Psat3g090680	SRX5504156	PRJNA517587_c1	4.00134	seed
Psat3g090680	SRX5914424	PRJNA543764_c2	0.9022	vegetative shoot system
Psat3g090680	SRX5914430	PRJNA543764_c3	0.850297	vegetative shoot system
Psat3g090680	SRX5914444	PRJNA543764_c11	2.57594	vegetative shoot system
Psat3g090680	SRX5914433	PRJNA543764_c8	0.395876	vegetative shoot system
Psat3g090680	SRX5914442	PRJNA543764_c9	1.49102	vegetative shoot system
Psat3g090680	SRX5914436	PRJNA543764_c7	0.31997	vegetative shoot system
Psat3g090680	SRX5914427	PRJNA543764_c4	3.87376	vegetative shoot system
Psat3g090680	SRX5914438	PRJNA543764_c6	0.422261	vegetative shoot system
Psat3g090680	SRX5914441	PRJNA543764_c9	0.676883	vegetative shoot system
Psat3g090680	SRX5914435	PRJNA543764_c7	0.487168	vegetative shoot system
Psat3g090680	SRX5914432	PRJNA543764_c12	2.05376	vegetative shoot system
Psat3g090680	SRX5914429	PRJNA543764_c3	0.506853	vegetative shoot system
Psat3g090680	SRX5914423	PRJNA543764_c2	0.912395	vegetative shoot system
Psat3g090680	SRX5914426	PRJNA543764_c1	0.437971	vegetative shoot system
Psat3g090680	SRX977878	PRJNA267198_c18	2.79429	legume fruit
Psat3g090680	SRX977922	PRJNA267198_c20	9.72855	seed
Psat3g090680	SRX769790	PRJNA267198_c15	14.066	peduncle
Psat3g090680	SRX769753	PRJNA267198_c10	3.56768	compound leaf
Psat3g090680	SRX769787	PRJNA267198_c12	2.63249	compound leaf
Psat3g090680	SRX977877	PRJNA267198_c17	7.09002	flower
Psat3g090680	SRX768287	PRJNA267198_c9	1.04047	vegetative shoot system
Psat3g090680	SRX977910	PRJNA267198_c19	14.6908	seed
Psat3g090680	SRX769789	PRJNA267198_c14	4.54577	stem
Psat3g090680	SRX769757	PRJNA267198_c11	4.62515	compound leaf
Psat3g090680	SRX768286	PRJNA267198_c8	1.07706	vegetative shoot system
Psat3g090680	SRX816181	PRJNA267198_c16	3.0996	flower
Psat3g090680	SRX769788	PRJNA267198_c13	3.86904	leaf tendril
